# Supplementary material for: Centimeter-size single crystal of a lead-free double perovskite for broad-spectrum polarization-sensitive detection
Source: Royal Society of Chemistry journal article supplement (doi:10.1039/d2tc03201e), 2022-01-01
Supplement: d2tc03201e1.pdf [file d2tc03201e1.pdf]

## Supporting Information

### Centimeter-size single crystal of a lead-free double perovskite for broad-spectrum polarization-sensitive detection

Zhou Li,<sup>ab</sup> Qin Chen,<sup>ab</sup> Ziyang Wang,<sup>b</sup> Yipeng Fan,<sup>ab</sup> Tingting Zhu,<sup>b</sup> Chengmin Ji<sup>\* b</sup>, Xiaojun Kuang<sup>\* a</sup> and Junhua Luo<sup>\* b</sup>

a.School of Chemistry and Biological Engineering (Guangxi Key Laboratory of Electrochemical and Magnetochemical Functional Materials), Guilin University of Technology, Guangxi, Guilin 541004 (China)

b.State Key Laboratory of Structural Chemistry, Fujian Institute of Research on the Structure of Matter, Chinese Academy of Sciences, Fuzhou, Fujian 35002 (China).

\*E-mail: jhluo@fjirsm.ac.cn, kuangxj@glut.edu.cn, cmji@fjirsm.ac.cn.

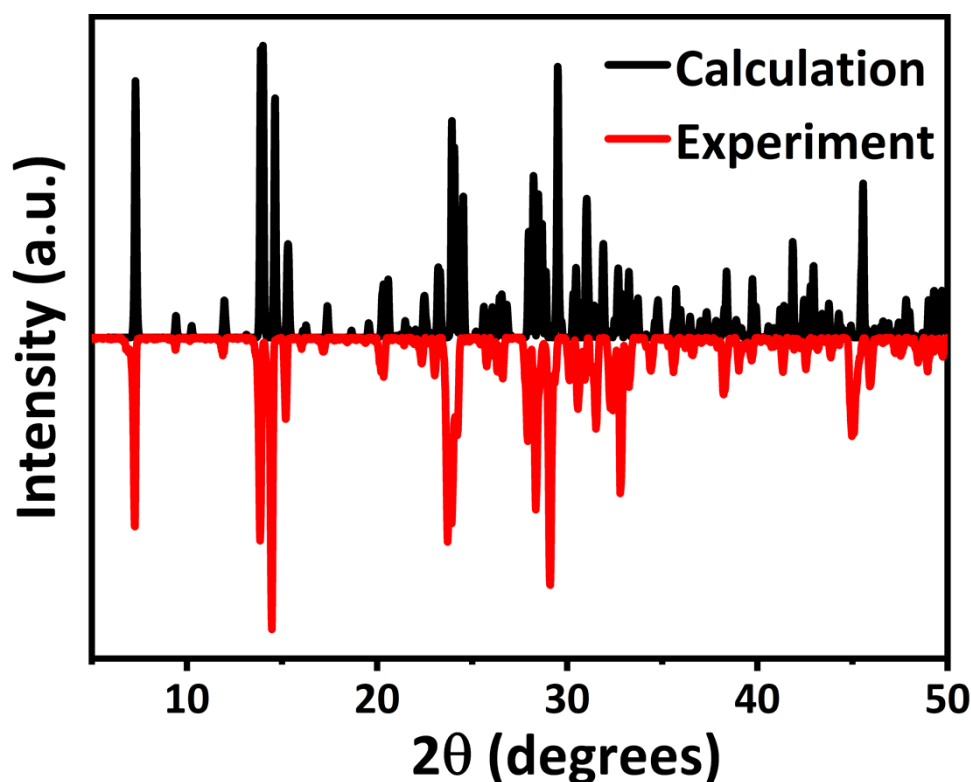

**Figure S1** Experimental and simulated X-ray powder diffraction patterns for  $(\text{IPA})_4\text{AgBiI}_8$ .

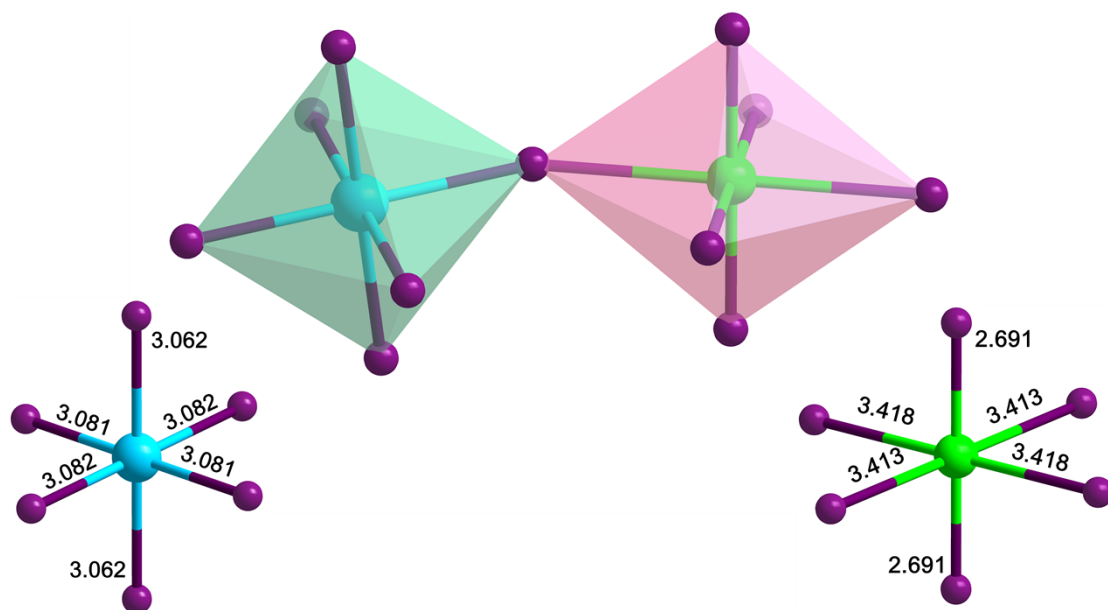

**Figure S2.** Two inhomogeneous octahedral configuration of  $\text{BiI}_6$  and  $\text{AgI}_6$  octahedra.

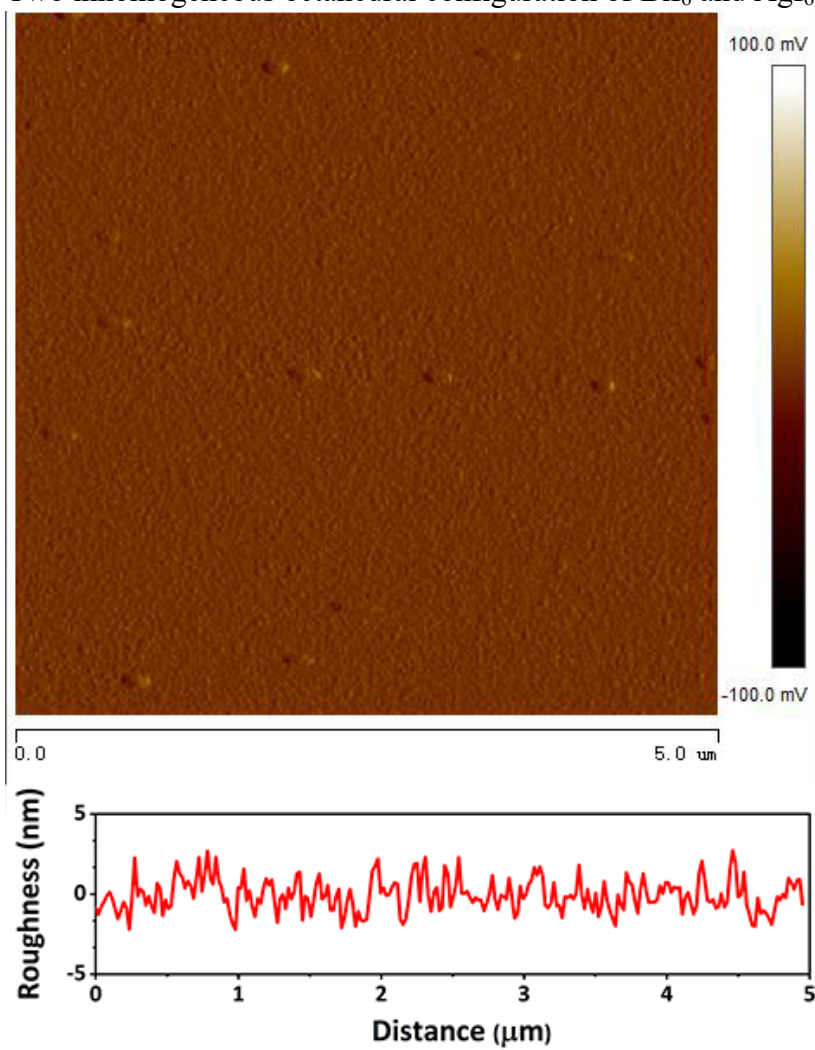

**Figure S3.** AFM image measured on the surface of single crystal of  $(\text{IPA})_4\text{AgBiI}_8$ .

**Polarized light**

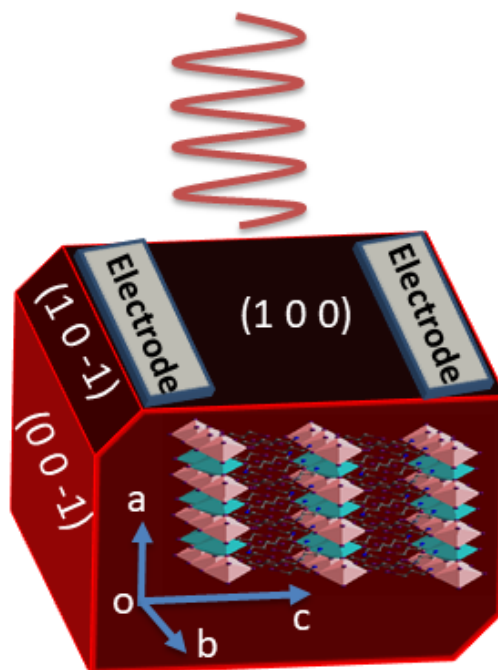

Figure S4. Schematic diagram for crystal-based detector.

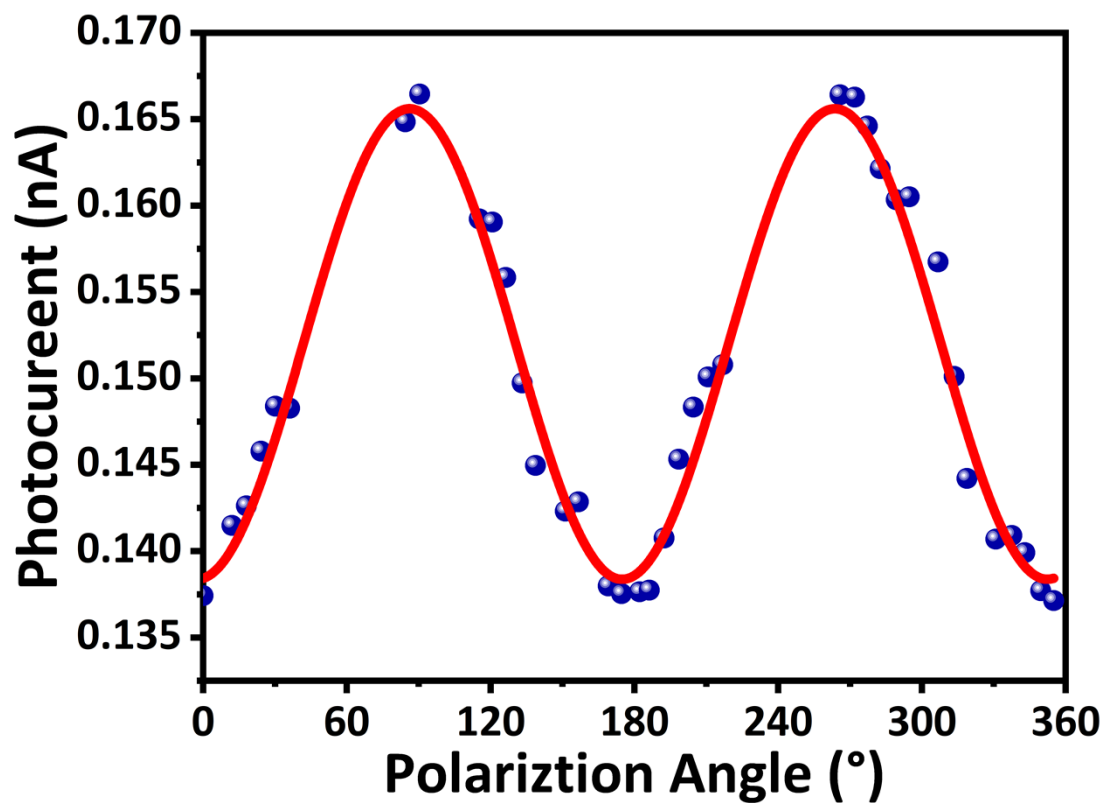

Figure S5. Polarized photoelectric test of  $(\text{IPA})_4\text{AgBiI}_8$ .

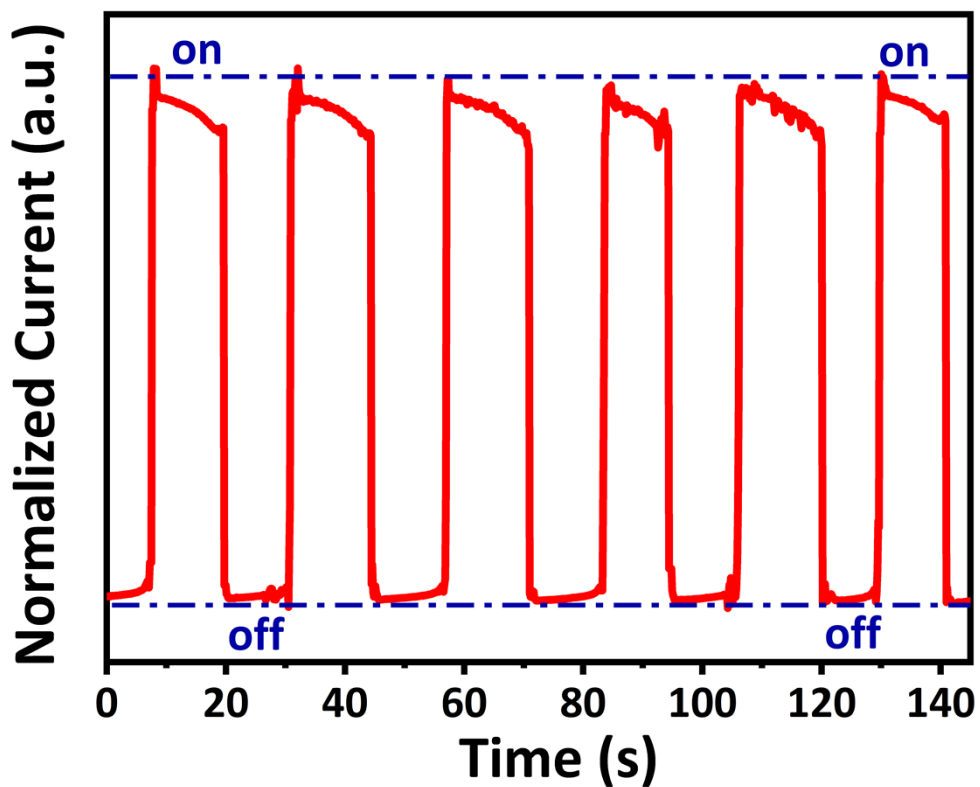

**Figure S6.** At 10 V bias, time-dependent switching cycles of photocurrent response for  $(\text{IPA})_4\text{AgBi}_8$ .

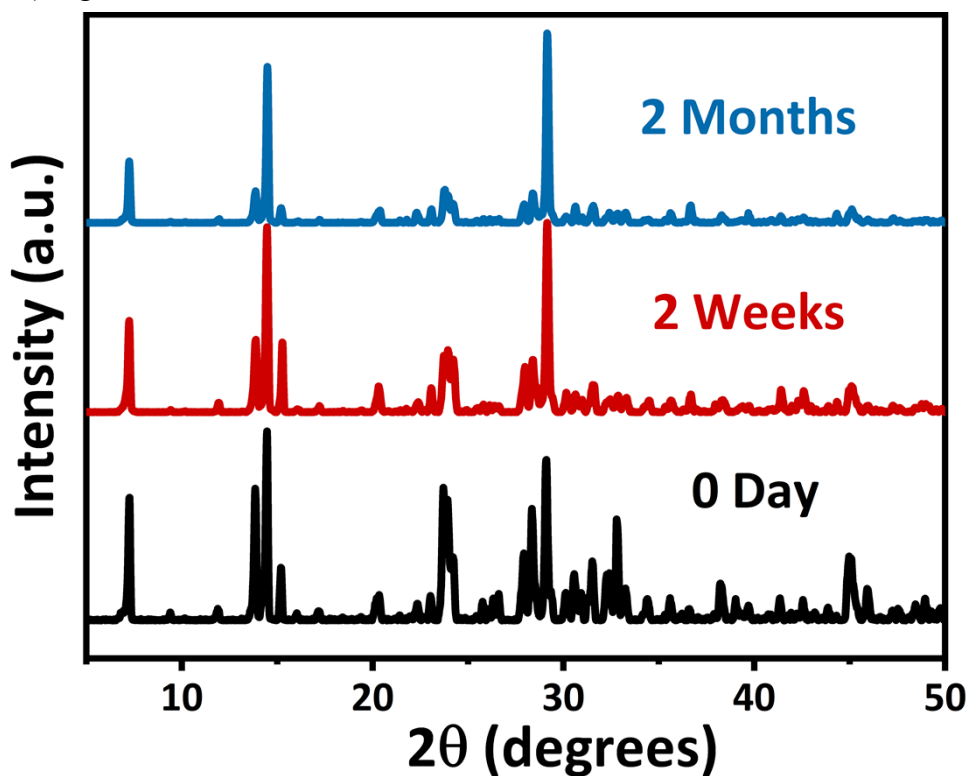

**Figure S6.** The PXR D spectra of  $(\text{IPA})_4\text{AgBi}_8$  powder and the simulated single crystal structure for comparison.

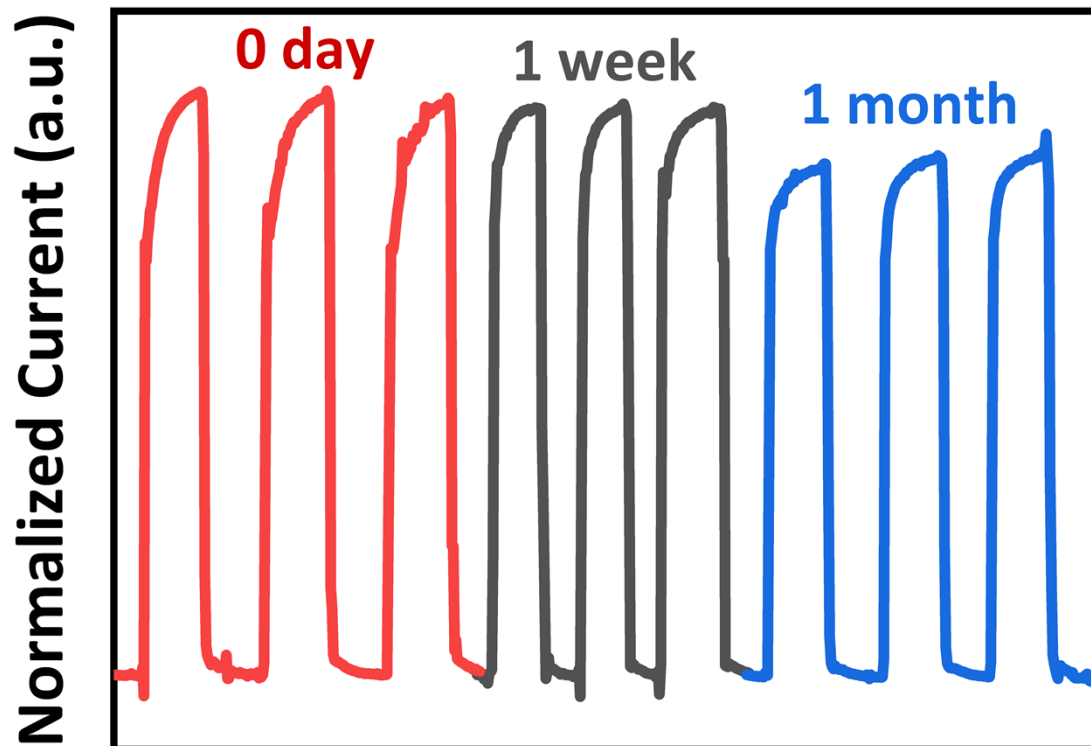

Figure S8. The stability of photoelectric properties of  $(\text{IPA})_4\text{AgBi}_8$ .

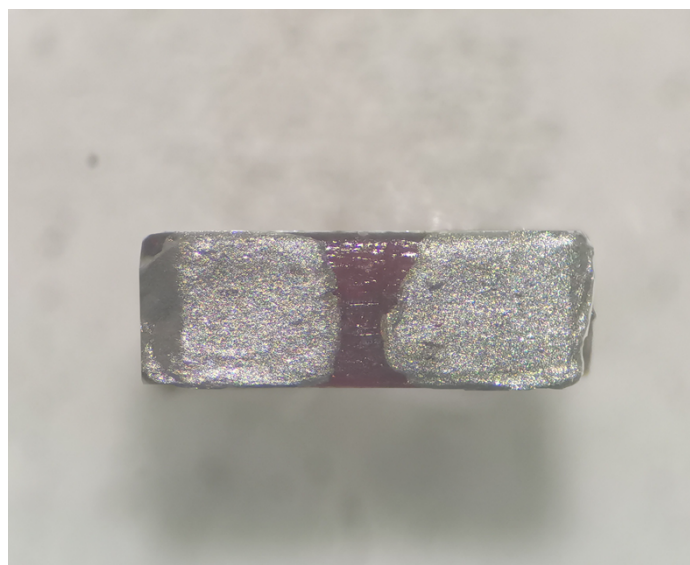

Figure S9. The electrode equipment photo.

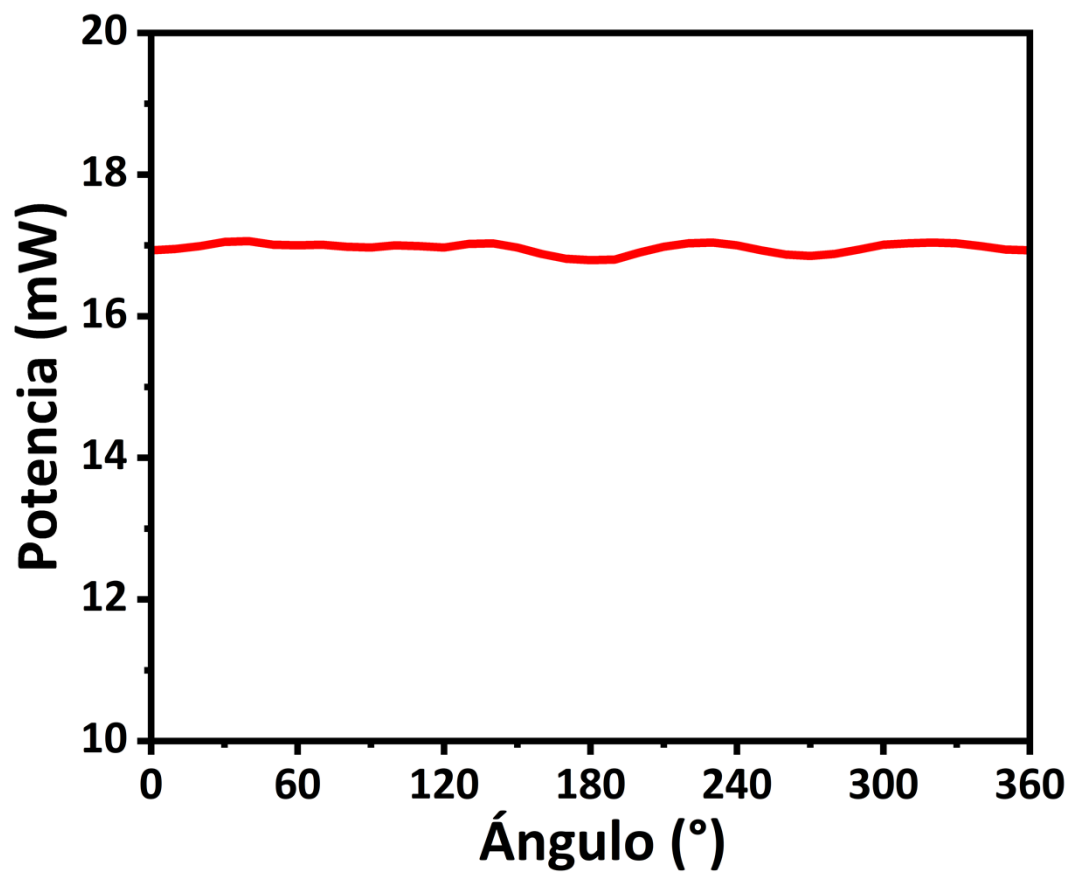

Figure S10. The light intensity at different polarization angles

**Table S1** Crystal data for (IPA)<sub>4</sub>AgBiI<sub>8</sub>. collected at 300 K.

---

|                                          |                                                                    |
|------------------------------------------|--------------------------------------------------------------------|
| Empirical formula                        | C <sub>12</sub> H <sub>36</sub> AgBiI <sub>12</sub> N <sub>4</sub> |
| Formula weight                           | 2076.10                                                            |
| Temperature/K                            | 299.92                                                             |
| Crystal system                           | triclinic                                                          |
| Space group                              | P-1                                                                |
| Cell parameters                          | a=8.7529(4)                                                        |
|                                          | b=9.4129(5)                                                        |
|                                          | C=12.3100(7)                                                       |
| V(Å <sup>3</sup> )                       | 1010.13(9)                                                         |
| Z,ρ <sub>cal.</sub> (g/cm <sup>3</sup> ) | 1                                                                  |
| F(000)                                   | 902.0                                                              |
| 2Theta range(°)                          | 5.436 to 55.136                                                    |
| Limiting indices                         | -11 ≤ h ≤ 11                                                       |
|                                          | -12 ≤ k ≤ 12                                                       |
|                                          | -16 ≤ l ≤ 16                                                       |
| Reflections collected                    | 29963                                                              |
| Independent reflections                  | 4652 [R <sub>int</sub> = 0.0618, R <sub>sigma</sub> = 0.0383]      |
| Data/restraints/parameters               | 4652/0/142                                                         |
| GOF                                      | 1.050                                                              |
| Final R indexes [I ≥ 2σ (I)]             | R <sub>1</sub> = 0.0472, wR <sub>2</sub> = 0.1492                  |
| Final R indexes [all data]               | R <sub>1</sub> = 0.0517, wR <sub>2</sub> = 0.1546                  |

---

**Table S2** The optical band gaps of typical halide double perovskites.

| Compound                                                                                           | Band gap (eV) | Optical absorption cutoff (nm) | Ref.     |
|----------------------------------------------------------------------------------------------------|---------------|--------------------------------|----------|
| Cs <sub>2</sub> AgBiBr <sub>6</sub>                                                                | 2.20          | 550                            | 1        |
| MA <sub>2</sub> AgBiBr <sub>6</sub>                                                                | 2.00          | 597                            | 1        |
| MA <sub>2</sub> AgBiI <sub>6</sub>                                                                 | 1.64          |                                | 1        |
| ( <i>i</i> -PA) <sub>2</sub> CsAgBiBr <sub>7</sub>                                                 | 2.85          | 526                            | 2        |
| (BA) <sub>2</sub> CsAgBiBr <sub>7</sub>                                                            | 2.40          | 522                            | 3        |
| (3AMPY) <sub>2</sub> AgBiI <sub>8</sub> ·H <sub>2</sub> O                                          | 1.86          | 675                            | 4        |
| (C <sub>6</sub> H <sub>16</sub> N <sub>2</sub> ) <sub>2</sub> AgBiI <sub>8</sub> ·H <sub>2</sub> O | 1.93          |                                | 5        |
| [AE2T] <sub>2</sub> AgBiI <sub>8</sub>                                                             | 2.00          |                                | 6        |
| [(R)-β-MPA] <sub>4</sub> AgBiI <sub>8</sub>                                                        | 2.01          | 616                            | 7        |
| (4,4-difluoropiperidinium) <sub>4</sub> AgBiI <sub>8</sub>                                         | 2.03          |                                | 8        |
| (IPA) <sub>4</sub> AgBiI <sub>8</sub>                                                              | 1.87          | 660                            | Our work |

1. S. M. Saeed; A. Hossein; G. M. Reza, *Materials Science in Semiconductor Processing*, 2021, **125**, 105639.
2. Y. Li; T. Yang; Z. Xu; X. Liu; X. Huang; S. Han; Y. Liu; M. Li; J. Luo; Z. Sun, *Angew Chem Int Ed Engl*, 2020, **59**, 3429.
3. Z. Xu; X. Liu; Y. Li; D. X. Liu; T. Yang; C. Ji; S. Han; P. Y. Xu; P. J. Luo; P. Z. Sun, *Angewandte Chemie*, 2019, **131**, 15757.
4. D. Fu; S. Wu; Y. Liu; Y. Yao; Y. He; X.-M. Zhang, *Inorganic Chemistry Frontiers*, 2021, **8**, 3576.
5. L. Y. Bi; Y. Q. Hu; M. Q. Li; T. L. Hu; H. L. Zhang; X. T. Yin; W. X. Que; M. S. Lassoued; Y. Z. Zheng, *J Mater Chem A*, 2019, **7**, 19662.
6. M. K. Jana; S. M. Janke; D. J. Dirkes; S. Dovletgeldi; C. Liu; X. X. Qin; K. Gundogdu; W. You; V. Blum; D. B. Mitzi, *Journal of the American Chemical Society*, 2019, **141**, 7955.
7. D. Li; X. Liu; W. Wu; Y. Peng; S. Zhao; L. Li; M. Hong; J. Luo, *Angewandte Chemie-International Edition*, 2021, **60**, 8415.
8. C. F. Wang; H. J. Li; M. G. Li; Y. Cui; X. Son; Q. W. Wang; J. Y. Jiang; M. M. Hua; Q. Xu; K. Zhao; H. Y. Ye; Y. Zhang, *Advanced Functional Materials*, 2021, **31**, 2009457.
